# Supplementary material for: The E3 ubiquitin ligase Itch regulates tumor suppressor protein RASSF5/NORE1 stability in an acetylation-dependent manner
Source: PubMed Central journal article supplement — Cell Death Dis. 2013 Mar 28;4(3):e565–. doi: 10.1038/cddis.2013.91 (PMC3615736; doi:10.1038/cddis.2013.91), 2013-03-28

# Supplementary Figure 1

**A**

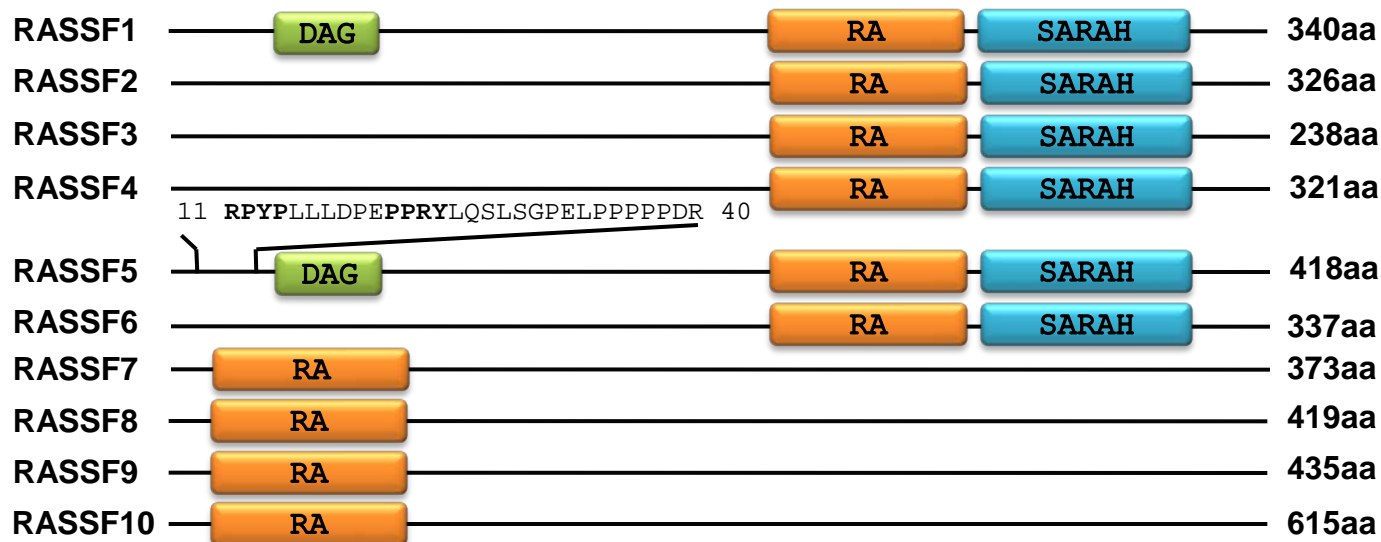

**B**

Sequence alignment of RASSF5 DAG domain across three samples (F5A, F5B, F5C). The alignment shows conserved residues and a gap in F5C.

```

F5A MAMASPAIGQRRPYPLLLDPEPPRYLQSLSGPELPPPPDRSSRLCVPAPLSTAPGAREGRSARRAARGNLEPPPRASRPARPLRPGLQQLRRRPGAPRPRDVR SIFEQPDPRVPAERG 120
F5B MAMASPAIGQRRPYPLLLDPEPPRYLQSLSGPELPPPPDRSSRLCVPAPLSTAPGAREGRSARRAARGNLEPPPRASRPARPLRPGLQQLRRRPGAPRPRDVR SIFEQPDPRVPAERG 120
F5C -----MTVDSSMS----- 8

F5A EGHCF AELVLPGGPGWCDL CGREVL RQALR CTNCKFTCHPECRSLIQLD CSQQEGLSRDRPSP ESTLTVTF S QNVCKPVEETQR PPTLQEIKQKIDSYNTREKNCLGMKLS EDGTYTGFI 240
F5B EGHCF AELVLPGGPGWCDL CGREVL RQALR CTNCKFTCHPECRSLIQLD CSQQEGLSRDRPSP ESTLTVTF S QNVCKPVEETQR PPTLQEIKQKIDSYNTREKNCLGMKLS EDGTYTGFI 240
F5C -----SGYCSLD--EELED CFFTAKTTFFRNAQSK-----HLSKNVCKPVEETQR PPTLQEIKQKIDSYNTREKNCLGMKLS EDGTYTGFI 87

F5A KVHLKLR RPVTVPAGIR PQSIYDAI KEVNLAATTDKRTS FYLPLDAIKQLHISSTTTVSEVIQGLLKKFMVVDNPQKFALFKRIHKDGVLFQKLSIADRPLYLRLLAGPDTEVLSFVLK 360
F5B KVHLKLR RPVTVPAGIR PQSIYDAI KEVNLAATTDKRTS FYLPLDAIKQLHISSTTTVSEVIQGLLKKFMVVDNPQKFALFKRIHKDGVGCLLHP----- 336
F5C KVHLKLR RPVTVPAGIR PQSIYDAI KEVNLAATTDKRTS FYLPLDAIKQLHISSTTTVSEVIQGLLKKFMVVDNPQKFALFKRIHKDGVLFQKLSIADRPLYLRLLAGPDTEVLSFVLK 207

F5A ENETGEVEWDAFSIPELQNFLTILEKEEQDKIQVQKKYDKFRQKLEEALRESQ GKPG 418
F5B ----- 418
F5C ENETGEVEWDAFSIPELQNFLTILEKEEQDKIQVQKKYDKFRQKLEEALRESQ GKPG 265
  
```

## Supplementary Figure 2

**A**

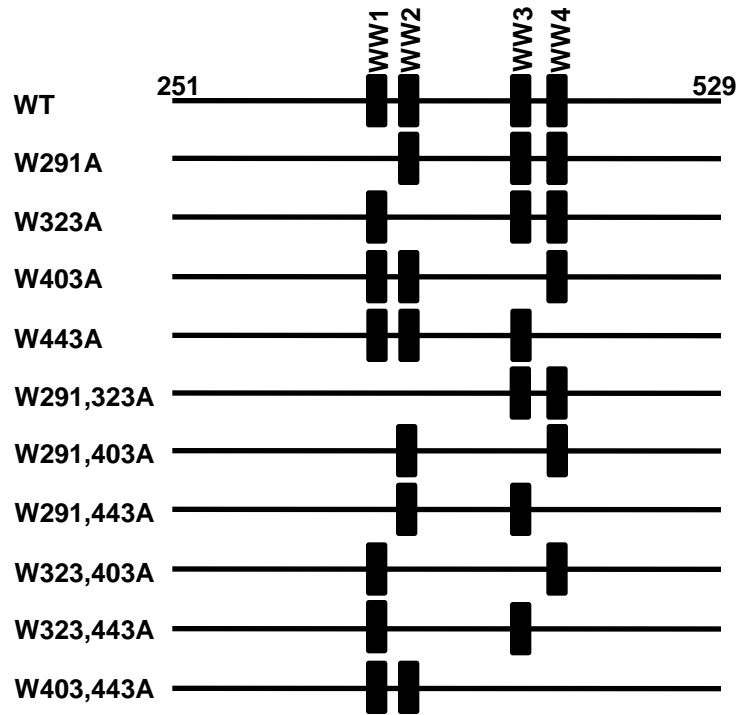

**B**

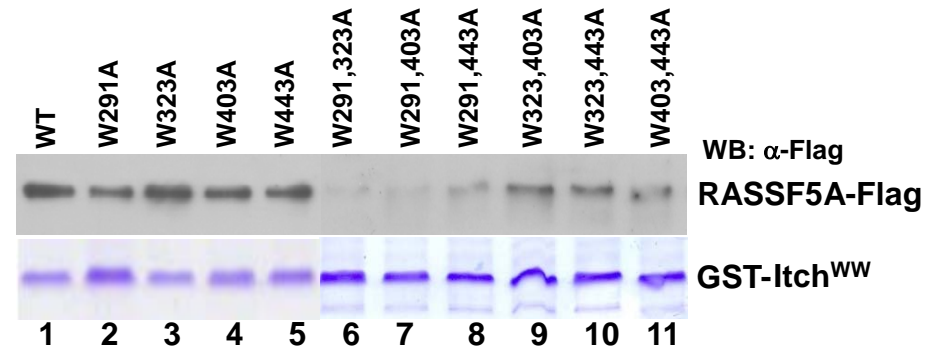

# Supplementary Figure 3

**A**

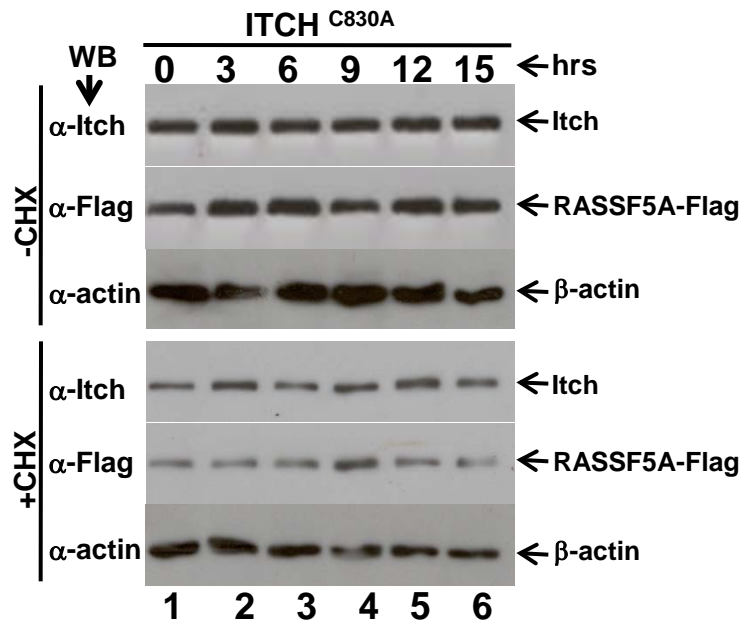

**B**

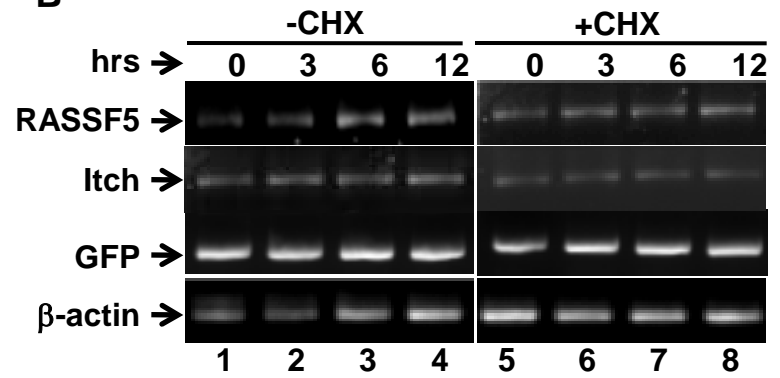

Supplementary Figure 4

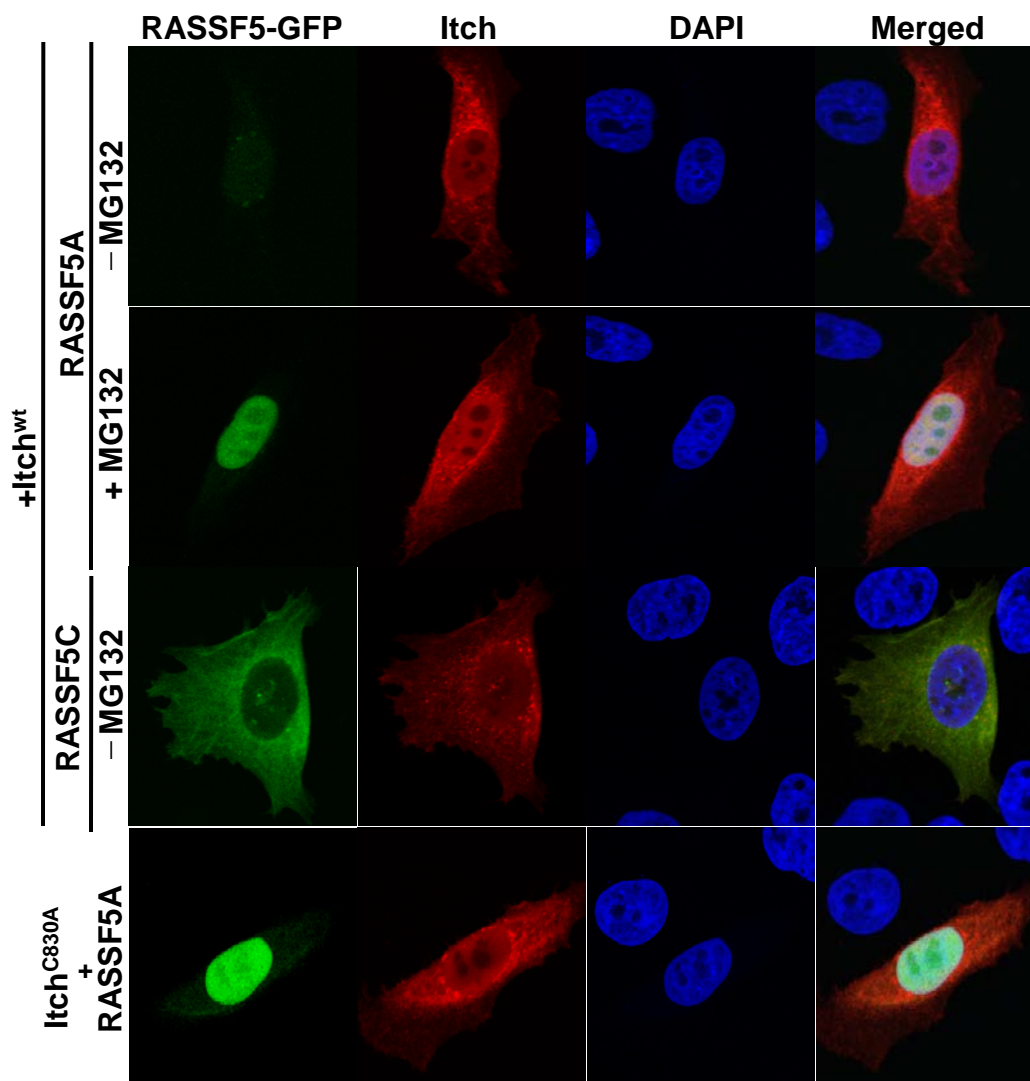

## Supplementary Figure 5

**A**

|        |       |            |             |            |      |
|--------|-------|------------|-------------|------------|------|
|        |       |            | ↓ ↓ ↓       |            |      |
| p73    | : 419 | QLLQRPSHLQ | <b>PPSY</b> | GPVLSPMNKV | 442  |
| c-Jun  | : 157 | GGFSASLHSE | <b>PPVY</b> | ANLSNFNPGA | 180  |
| LATS-1 | : 363 | VPAGTVNRQF | <b>PPPY</b> | PLTAANGQSP | 386  |
|        | : 549 | VAEAPNYQGF | <b>PPPY</b> | PKHLLHQNPS | 569  |
| P63    | : 530 | SMPSTSHCTF | <b>PPPY</b> | PTDCSIVSFL | 553  |
| SMAD1  | : 214 | SPFQMPADTF | <b>PPAY</b> | LPPEDPMTQD | 237  |
| EBBR4  | :1022 | YLVPQAFNIE | <b>PPIY</b> | TSRARIDSNR | 1045 |
|        | :1043 | SNRSEIGHSE | <b>PPAY</b> | TPMSGNQFVY | 1066 |
|        | :1288 | FSLKPGTVLE | <b>PPPY</b> | RHRNTVV    | 1308 |
| RUNX1  | : 345 | GSATRYHTYL | <b>PPPY</b> | PGSSQAQGGP | 368  |
| WBP2   | : 187 | DGAMGYVQPF | <b>PPPY</b> | PGPMEPPVSG | 210  |
|        | : 239 | NVYMPTSQPE | <b>PPPY</b> | YPPEDKKT   | 260  |
| RASSF5 | : 11  | RPYPLLLDPE | <b>PPRY</b> | LQSLSGPELP | 34   |

**B**

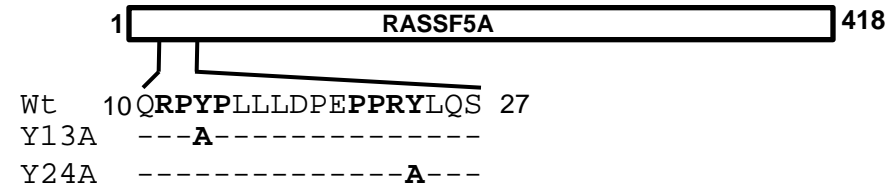

## Supplementary Figure 6

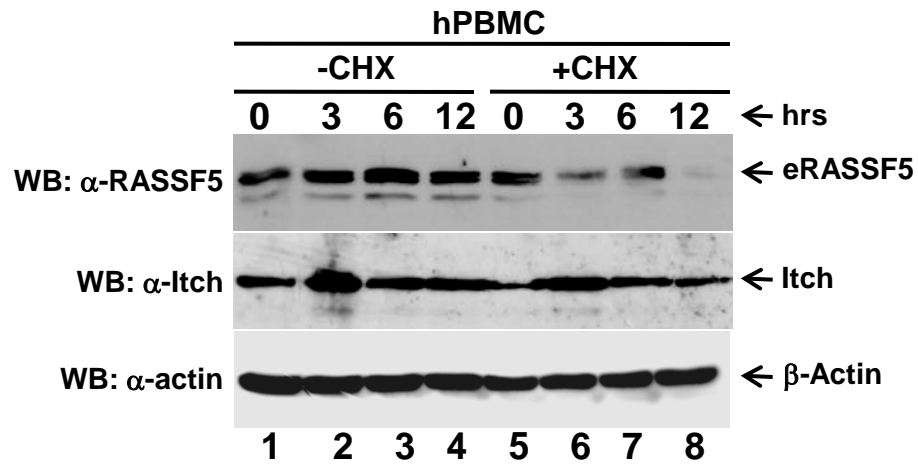

# Supplementary Figure 7

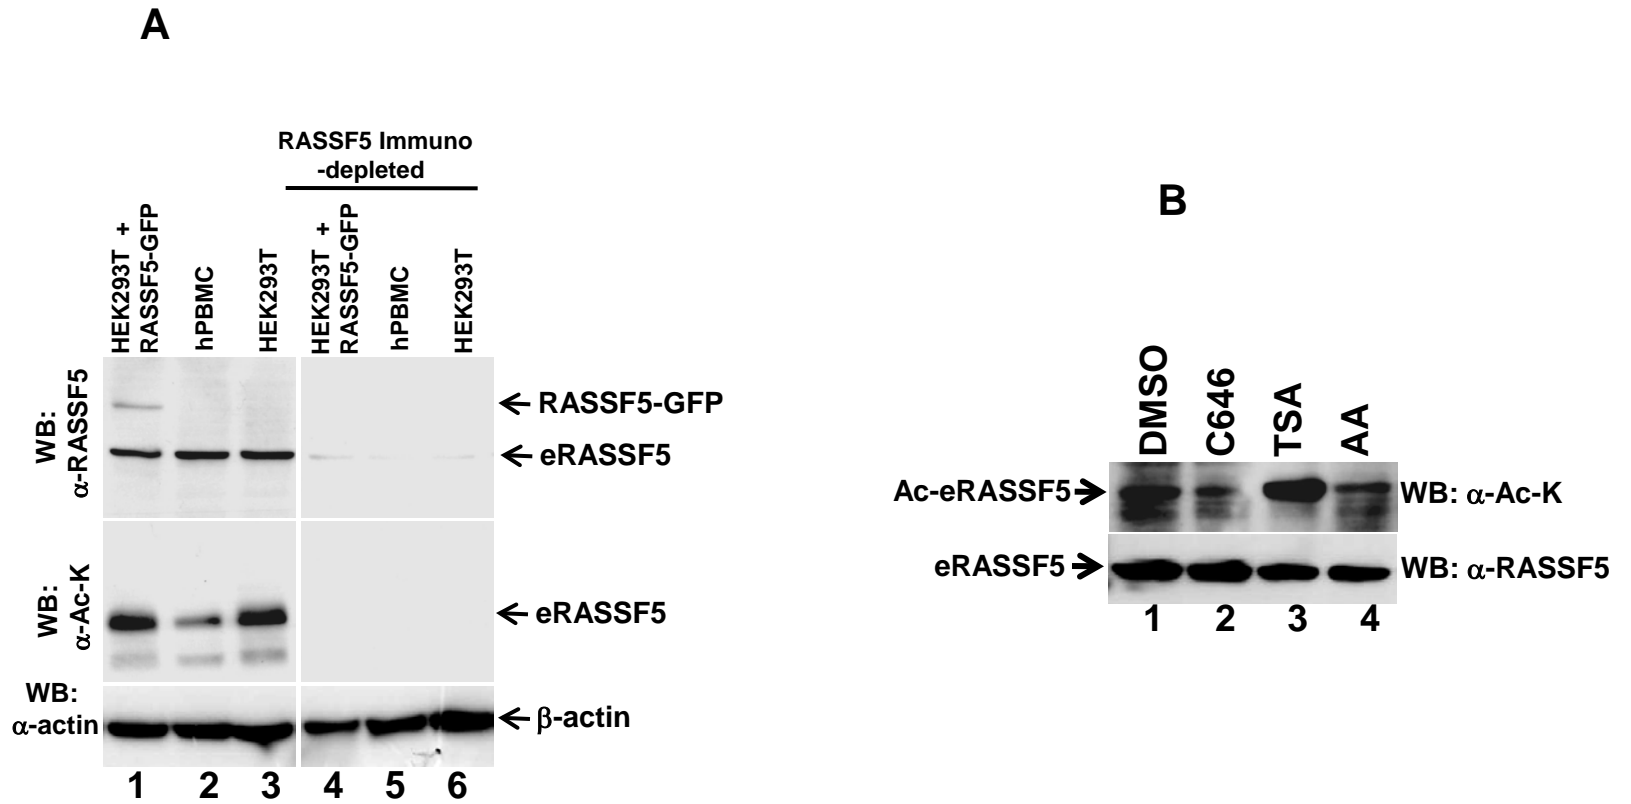

## Supplementary Figure 8

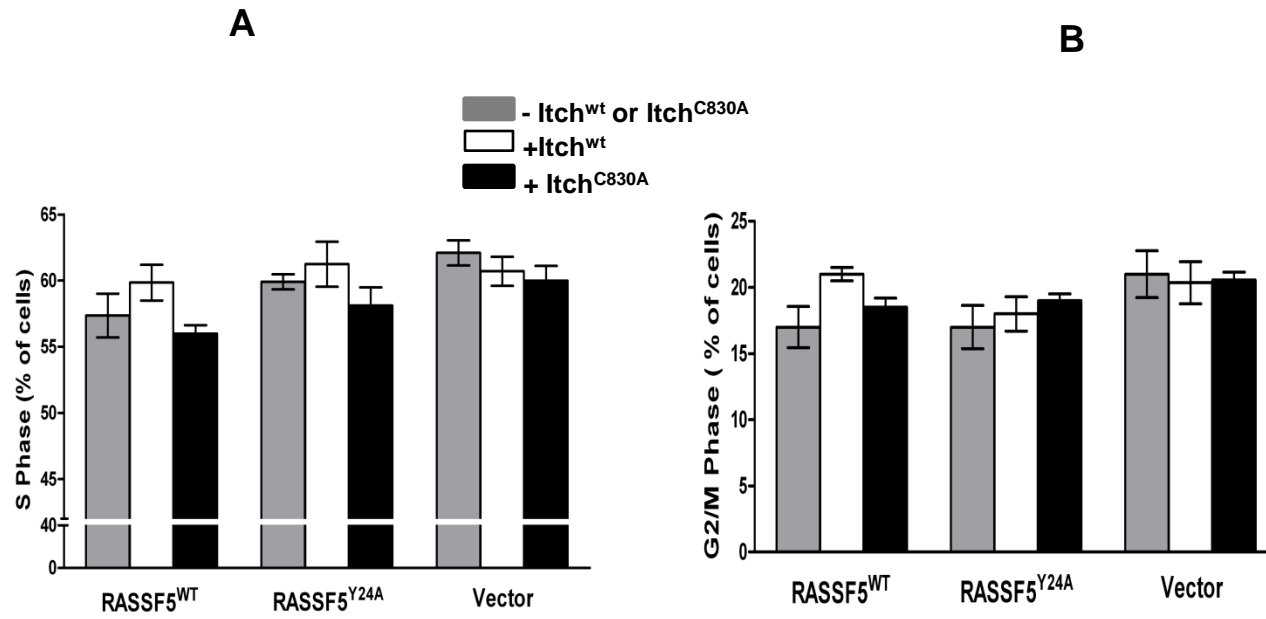



# Supplementary Figure 8C

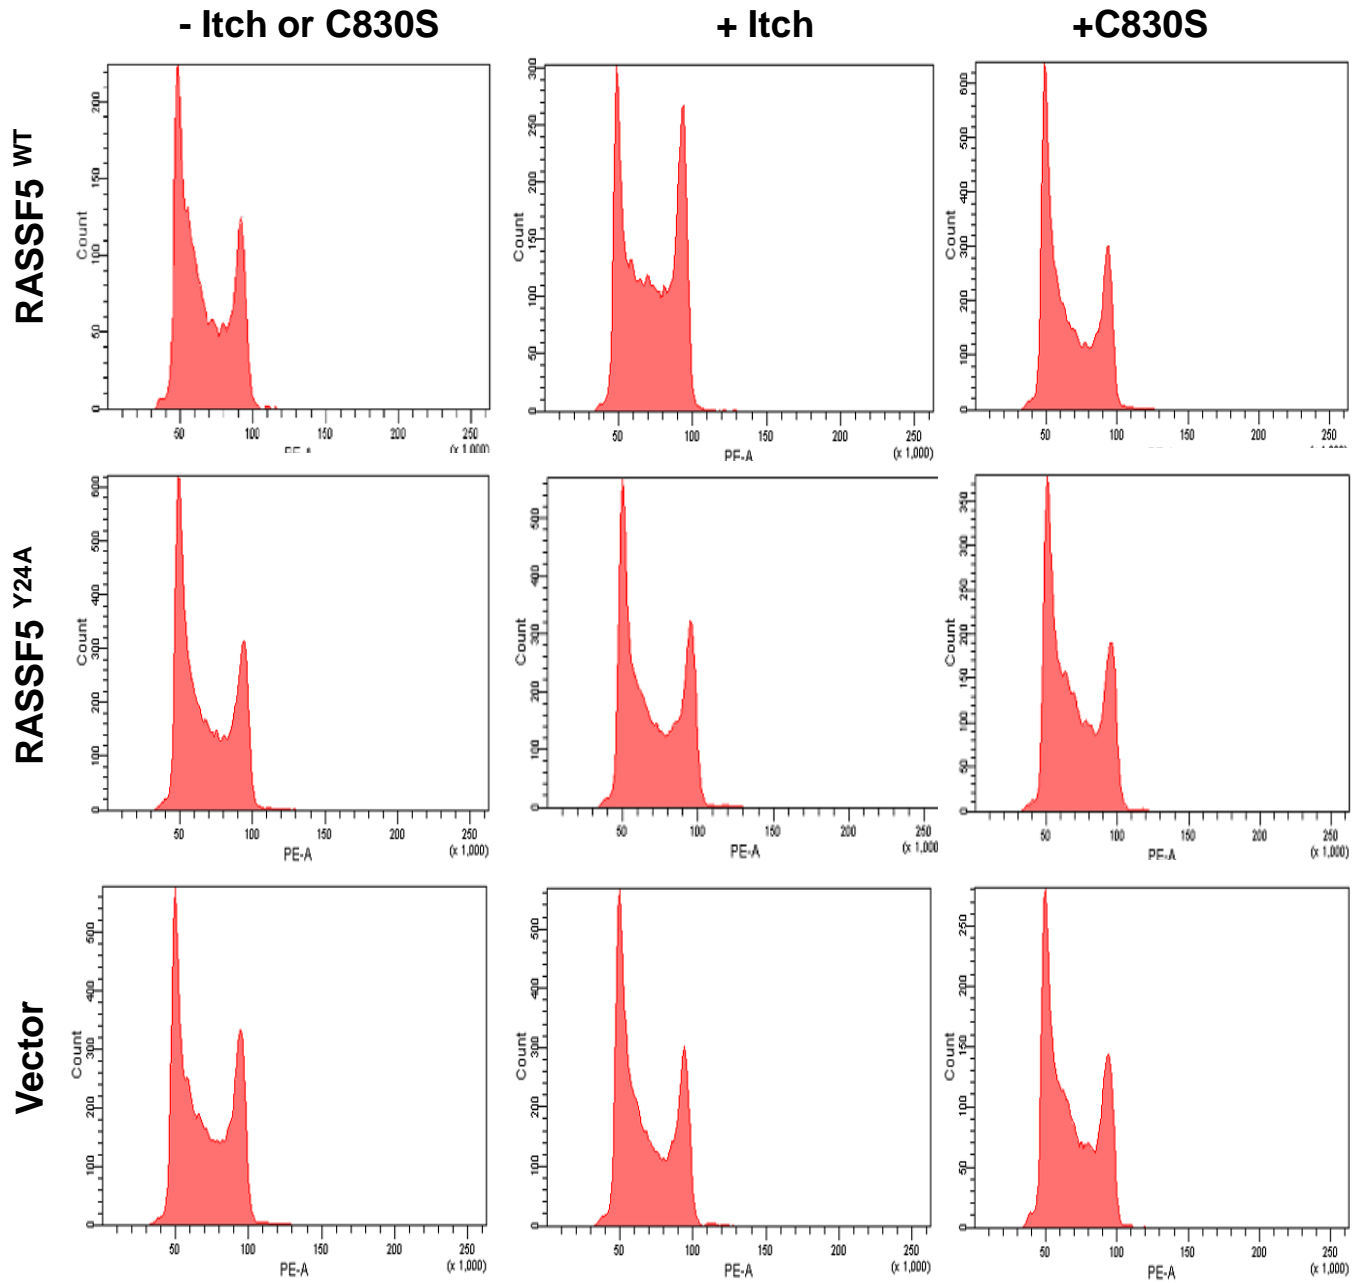

## Supplementary Figure 9

**A**

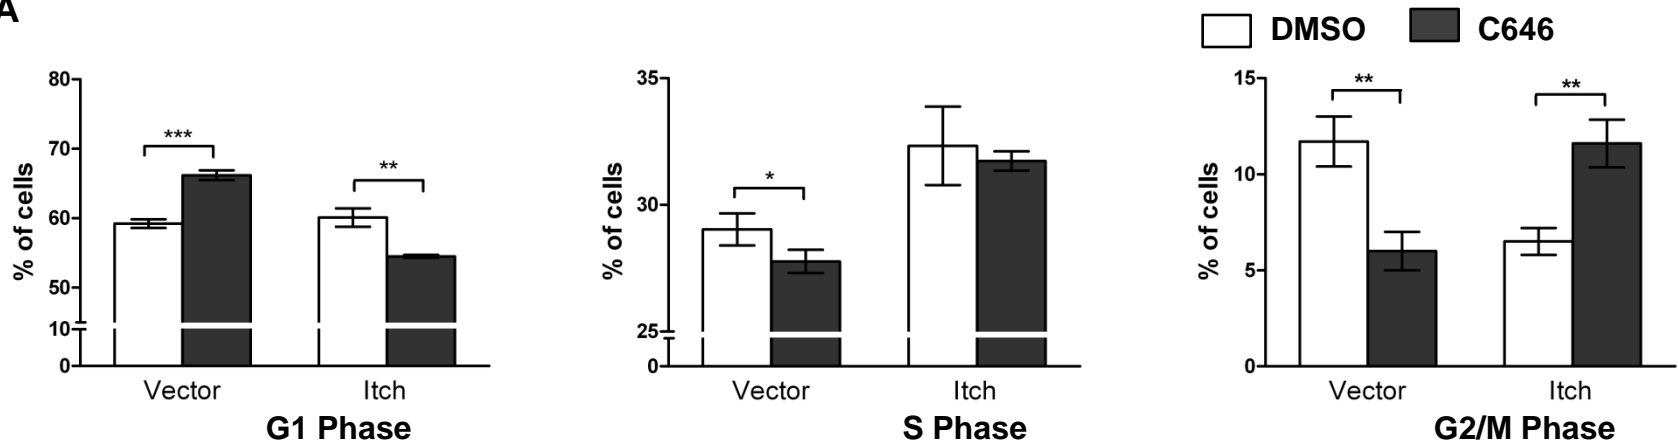

**B**

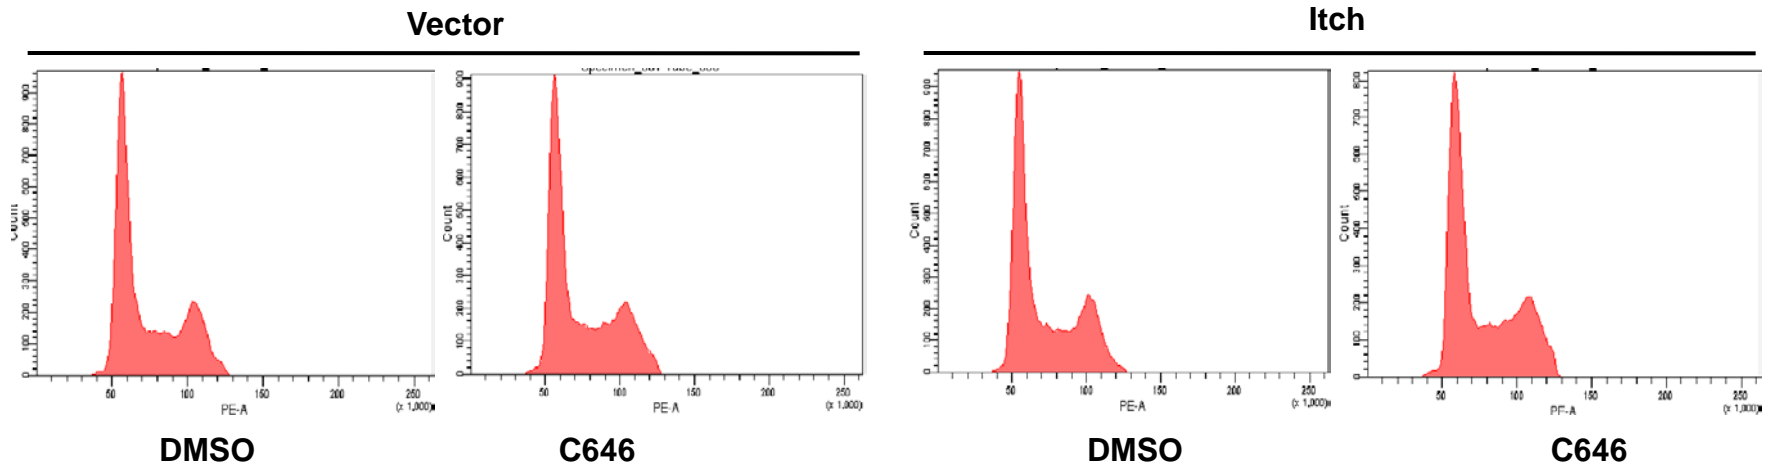

Supplement: cddis201391x2.pdf [file cddis201391x2.pdf]
