# Supplementary material for: The E3 ubiquitin ligase Itch regulates tumor suppressor protein RASSF5/NORE1 stability in an acetylation-dependent manner
Source: PubMed Central journal article supplement — Cell Death Dis. 2013 Mar 28;4(3):e565–. doi: 10.1038/cddis.2013.91 (PMC3615736; doi:10.1038/cddis.2013.91), 2013-03-28
Supplement: cddis201391x1.pdf [file cddis201391x1.pdf]

## Supplementary Table 1: List of Primers used in this study

| Name                       | Sequence (5' -3')                                                        |
|----------------------------|--------------------------------------------------------------------------|
| Itch 251Bg1II <sup>+</sup> | AGCCC <u>AGATCT</u> GAATACAAATACAAATACATC                                |
| Itch 529SalI <sup>-</sup>  | GTGCC <u>CTCGAC</u> GGGACTGAAGCTCATTATCTG                                |
| Itch W291A <sup>+</sup>    | CCCTTGCCACCTGGTGCGGAGCAGAGAGTGGAC                                        |
| Itch W291A <sup>-</sup>    | GTCCACTCTCTGCTCCGCACCAGGTGGCAAGGG                                        |
| Itch W323A <sup>+</sup>    | CCTCTACCTCCTGGCGCGGAACGGCGGGTTGAC                                        |
| Itch W323A <sup>-</sup>    | GTCAACCCGCCGTTCCGCGCCAGGAGGTAGAGG                                        |
| Itch W403A <sup>+</sup>    | CCATTGCCACCTGGAGCGGAGAAGAGAACAGAC                                        |
| Itch W403A <sup>-</sup>    | GTCTGTTCTCTTCTCCGCTCCAGGTGGCAATGG                                        |
| Itch W433A <sup>+</sup>    | CCCTTACCTGAAGGTGCGGAAATGAGATTACACA                                       |
| Itch W433A <sup>-</sup>    | TGTGAATCTCATTTCCGCACCTTCAGGTAAGGG                                        |
| RASSF1A EcoRI <sup>+</sup> | ATCTCG <u>GAATT</u> CATGTCGGGGGAGCCTGAGCT                                |
| RASSF1A XhoI <sup>-</sup>  | AGGGAT <u>CTCGAG</u> TCACCCAAGGGGGCAGGCGT                                |
| RASSF2 BamHI <sup>+</sup>  | CTACCA <u>GGATCC</u> ATGGACTACAGCCACCAAAC                                |
| RASSF2 XhoI <sup>-</sup>   | CCATTG <u>CTCGAG</u> TCAGATTGTTGCTGGGGTCT                                |
| RASSF5 EcoRI <sup>+</sup>  | ATCTCC <u>GAATTC</u> ATGGCCATGGCGTCCCCGGC                                |
| RASSF5 XhoI <sup>-</sup>   | GGATCCCTCGAGGCCAGGTTTGCCCTGGGATTCTCT                                     |
| RASSF5 Y13A <sup>+</sup>   | ATCGGGCAGCGCCCGGCTCCGCTACTCTTGGAC                                        |
| RASSF5 Y13A <sup>-</sup>   | ATCGGGCAGCGCCCGGCTCCGCTACTCTTGGAC                                        |
| RASSF5 Y262A <sup>+</sup>  | CGGCCCCAGTCCATCGCTGATGCCATCAAGGAG                                        |
| RASSF5 Y262A <sup>-</sup>  | CTCCTTGATGGCATCAGCGATGGACTGGGGCCG                                        |
| RASSF5 Y281A <sup>+</sup>  | AAGCGGACATCCTTCGCTCTGCCCTAGATGCC                                         |
| RASSF5 Y281A <sup>-</sup>  | GGCATCTAGGGGCAGAGCGAAGGATGTCCGCTT                                        |
| RASSF5 Y24A <sup>+</sup>   | CCCGAGCCGCCGCGCGCTACAGAGCCTGAG                                           |
| RASSF5 Y24A <sup>-</sup>   | CTCAGGCTCTGTAGCGCGCGGGCGGCTCGGG                                          |
| RASSF5 Y218A <sup>+</sup>  | CAGAAGATCGACAGCGCAACACGCGAGAGAAG                                         |
| RASSF5 Y218A <sup>-</sup>  | CTTCTCTCGCGTGTTCGCCTGTTCGATCTTCTG                                        |
| RASSF7 KpnI <sup>+</sup>   | GGACAGAAGCTT <u>GGTACC</u> GCCGCCACCATGTTGTTGGGACTGGCGGCCATGGAGCTGAAGG   |
| RASSF7 XhoI <sup>-</sup>   | TGCACC <u>CTCGAG</u> TCAGATATCCAGAGCCTGGGGCTGGGGCTGGGCTGCCAGAGGAC        |
| RASSF8 KpnI <sup>+</sup>   | ATCATCGGATCC <u>GGTACC</u> GCCGCCACCATGGAACCTAAAGTATGGGTGGATGGAGTTCAGAGG |
| RASSF8 XhoI <sup>-</sup>   | TGCACC <u>CTCGAG</u> CTAGATATCTACATATATGCCTTCAGGATTTAAACCAGATG           |
| RASSF10 EcoRI <sup>+</sup> | TAG <u>GAATTC</u> GCCGCCACCATGGATCCTTCGGAAAAGAAG                         |
| RASSF10 XhoI <sup>-</sup>  | TATA <u>CTCGAG</u> CTAGGTACCCACAAGGGATTTCGCACATGGGCA                     |

(<sup>+</sup>) Forward primer; (<sup>-</sup>) Reverse primer
